---

# 1 The Evolutionary Landscape of Pan-Cancer Drives Clinical Aggression

2

3 Shichao Pang<sup>1</sup>, Leilei Wu<sup>2</sup>, Xin Shen<sup>1</sup>, Yidi Sun<sup>4</sup>, Jingfang Wang<sup>3\*</sup>, Yi-Lei Zhao<sup>2\*</sup>, Zhen Wang<sup>4\*</sup>, Yixue Li<sup>2,4\*</sup>

4 1 Department of Statistics, School of Mathematical Sciences, Shanghai Jiao Tong University, Shanghai, 200240, China.

5 2 Department of Bioinformatics and Biostatistics, MOE LSB and LSC, State Key Laboratory of Microbial Metabolism, Joint

6 International Research Laboratory of Metabolic & Developmental Sciences, School of Life Sciences and Biotechnology, Shanghai

7 Jiao Tong University, Shanghai, 200240, China.

8 3 Shanghai Center for Systems Biomedicine, Shanghai Jiao Tong University, Shanghai, 200240, China.

9 4 Key Lab of Computational Biology, CAS-MPG Partner Institute for Computational Biology, Shanghai Institutes for Biological  
10 Sciences, Chinese Academy of Sciences, Shanghai, 200031, China.

11 \* Correspondence and requests for materials should be addressed to Y.X.L. (email: [yxli@sibs.ac.cn](mailto:yxli@sibs.ac.cn)), Z.W. (email:  
12 [zwang01@sibs.ac.cn](mailto:zwang01@sibs.ac.cn)), Y.-L.Z. (email: [yileizhao@sjtu.edu.cn](mailto:yileizhao@sjtu.edu.cn)) or J.F.W. (email: [jfwang8113@sjtu.edu.cn](mailto:jfwang8113@sjtu.edu.cn))

13

14

15

16

17

18

19

20

21

22

---

23 **Abstract**

24       Although cancer mechanisms differ from occurrence and development, some of them have  
25 similar oncogenesis, which leads to similar clinical phenotypes. Most existing genotyping studies look  
26 at "omics" data, but intentionally or unintentionally avoided that cancer is a time-dependent  
27 evolutionary process, biologically represented by the time evolution of tumor clones. We used the  
28 Bayesian mutation landscape approach to reconstruct the evolutionary process of cancer by acquiring  
29 somatic mutation data consisting of 21 cancer types. Four representative evolution patterns of pan-  
30 cancer have been discovered: trees, chaos, biconvex, and Cambrian, and a strong correlation between  
31 these four evolutionary patterns and clinical aggressivity. We further explained the characteristics of  
32 the corresponding biological systems in the evolution of pan cancer by analyzing the function of  
33 differentially expressed protein-protein interaction networks. Our results explained the difference in  
34 clinical aggressivity between cancer evolution patterns from the evolution of tumor clones and  
35 exposed the functional mechanism behind.

36

37

38

39

40

41

42

43

44

45

46

47

48

49

## 50 **Introduction**

51 Cancer is a multistage process that abnormal cells invade or spread to other parts of the  
52 body(Plummer et al. 2016), causing about 15.7% of human deaths(Wang et al. 2016). Different  
53 cancers vary a lot in prognosis and exacerbation. For example, patients with breast tumor have a 72%  
54 5-year survival rate in stage III, but only 3% pancreatic patients can survive after 5 years(Howlader N,  
55 Noone AM, Krapcho M, Miller D, Bishop K, Kosary CL, Yu M, Ruhl J, Tatalovich Z, Mariotto A,  
56 Lewis DR, Chen HS, Feuer EJ 1975). Usually, similar oncogenesis will lead to similar clinical  
57 outcomes. For instance, different type of cancers sometimes positively respond to the same chemical  
58 analogous and vaccine(Howell-Jones et al. 2010), and share similar mutation frequency of genes in  
59 background for the related opening area and frequency of the double helix DNA strands(Perry Evans,  
60 Stefan Avey, Yong Kong 2013). This is the starting point of pan-cancer researches. Scientists have  
61 tried diverse methods to identify pan-cancer pattern using omics data, e.g., somatic nucleotide  
62 variants (SNV)(Leiserson et al. 2015), copy number variation (CNV)(Zack et al. 2013),  
63 proteomics(Zhang et al. 2014) and DNA methylation(Yang et al. 2017). But the results are not as  
64 expected, because the occurrence and development of cancers is a time-dependent evolutionary  
65 process. Recent studies indicated that the tumor aggressivity always links to its heterogeneity(Jögi et  
66 al. 2012), and reflects in clinical outcomes. Analysis of cancer evolutionary process combined with  
67 time-dependent survivals could help us to figure out the clinical aggressivity of tumors.

68 Cancers can be viewed as an evolutionary process based on the clonal selection and dynamic  
69 process of immune responses(Gong et al. 2009). The accumulation of somatic mutations during clonal  
70 expansion, combined with microenvironment variations(Nowell and Nowell PC. 1976), drives the  
71 evolutionary changes of tumor cells. The stochastic process is the theoretical foundation of cancer  
72 evolution. For instance, the linear theory came out in 2003(Nowak et al. 2003) compared the cancer  
73 evolution process with the Moran process(Nowak et al. 2003). Following nonlinear and branching  
74 theory(Anderson et al. 2011) reminded us to pay more attention to subclones and explore possible  
75 paths for cancer progression. In 2015, the big bang theory raised the idea that tumor expanded  
76 predominantly from an early clone mixed with numerous subclones(Sottoriva et al. 2015). Besides,  
77 recent studies also put forward a neutral evolutionary theory(Williams et al. 2016), similar to

78 Kimura's (Kimura 1977). Our previous study on clear cell renal carcinoma reconstructed a  
79 phylogenetic tree model in a fashion of stage-by-stage expansion (Pang et al. 2018). Since these  
80 theories were based on the studies of different cancers, we need to use a uniform algorithm to figure  
81 out the evolution patterns of pan-cancer.

82 In the current study, we reconstructed the evolution processes for pan-cancers with somatic  
83 mutations across pathological stages, based on which four representative evolutionary patterns (tree,  
84 chaos, biconvex and Cambrian) were proposed. Then we analyzed the similarities and differences of  
85 clinical aggressivity for these evolutionary patterns. We further explained the functional  
86 characteristics of the pan-cancer evolution pattern by a protein-protein interaction network based on  
87 the differentially expressed genes.

88

## 89 **Results**

### 90 **Mutation and survival landscape of pan-cancer**

91 We collected clinical and genomic data sets of 21 types of cancers from the Cancer Genome  
92 Atlas (TCGA) cohort (The full names of cancers were listed in **Table S1**). Since not all of them were  
93 well-paired, we finally chose 5,134 samples with somatic SNVs for constructing evolution processes  
94 and 9,249 samples for survival analysis. The annotation information on related biological system,  
95 early detection of cancer, tumor type and M/C class were showed in **Table S1**.

96 The gene mutation landscape indicated that mutation frequency differed among different  
97 types of cancers. For instance, SKCM and UCEC had high discreteness, while KIRC and THCA were  
98 centralized (**Fig. 1a**). Additionally, gene mutation frequency did not increase with the progress of  
99 pathological stages in most cancers (**Fig. 1b, Table S2**). Although mutation frequency always  
100 correlated with tumor deterioration for specific cancers, general survival outcome didn't exhibit a  
101 consistence among pan-cancer (**Fig. 1c**). For example, even with a relatively low mutation frequency,  
102 OV showed a poor 5-year survival rate. Then we carried out a hierarchical cluster analysis with a  
103 combination of mutation frequency and 5-year survival rate (**Fig. 1d**). In the yellow box cluster, both  
104 OV and LUSC showed poor survival outcomes, but LUSC possessed a high mutation frequency. As

105 survival rate is a time corresponding symptom of cancers, we reconstructed evolution processes for  
 106 cancers across pathological stages to figure out the similarities and differences of oncogenesis in pan-  
 107 cancer.

108 **Figure 1: Mutation and clinical landscape of 21 types of cancers.** (A). Mutation frequency of 21  
 109 types of cancers. (B). Mutation frequency of 21 types of cancers in each pathological stages. (C).  
 110 Survival curve of 21 types of cancers (Kaplan-Meier estimator). (D). Correlation heatmap of mutation  
 111 (median mutation frequency) and survival (5-year survival rate) features in 21 types of cancers.

112

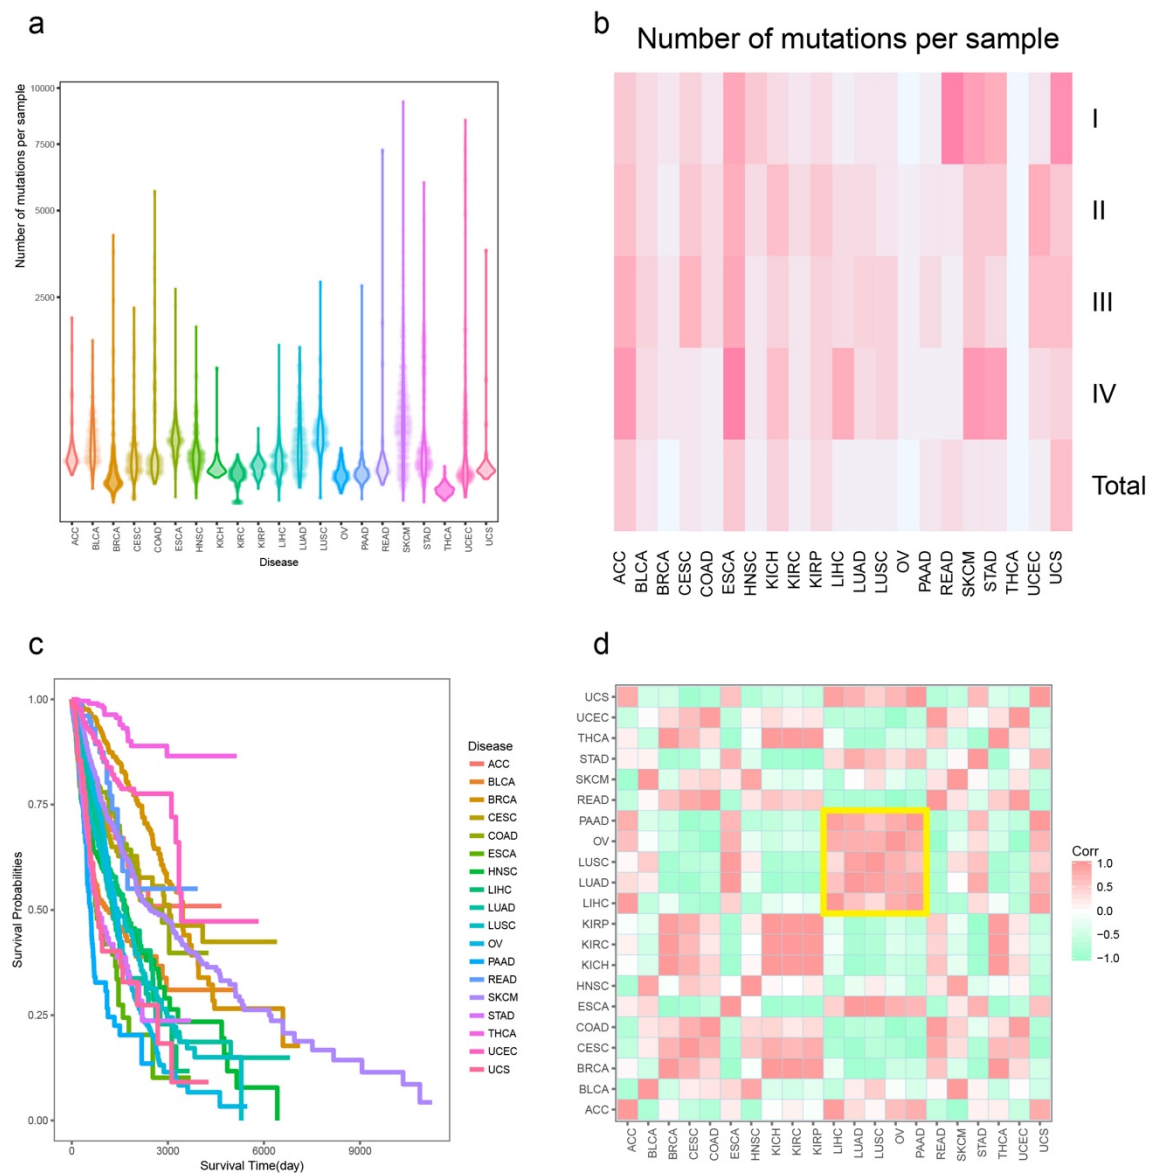

113

114

115  
116  
117  
118  
119  
120  
121  
122  
123  
124  
125  
126  
127  
128  
129  
130  
131  
132  
133  
134  
135  
136  
137  
138  
139

## Reconstruction of pan-cancer evolution process and NMF cluster-based pattern

Since genetic studies always focused on high-frequency mutations, the evolutionary path and essential variations with moderate frequency were missing generally. We employed the Bayesian Mutation Landscape (BML) methods to reconstruct evolutionary processes based on somatic mutations, and generated directed acyclic graphs (DAGs) of each cancer using four pathological stages representing four-time points during the tumor progression (**Fig. S1**). The bootstrap method was used to extract information with a highly statistical confidence (for detailed information, please see **Methods**). A total of 12 features were extracted, including DAG nodes, edges and key genes in each pathological stage. Here, we defined key genes as those appearing in more than one pathological stage. Interestingly, the four vectors extracted for nonnegative matrix factorization (NMF) clusters coincide with pathological stages: vector 3 and vector 4 were mainly contributed by stage I and II, respectively; vector 2 and vector 1 were mainly contributed by stage III and IV. In addition, stage III also had a slight contribution to vector 1 (**Fig. S2**). Finally, we generated four evolution patterns for cancers based on the NMF clusters (**Fig. 2a, 2b and 2c**).

**Figure 2:** Evolution pattern of 21 types of cancers. (A). Consensus map of pan-cancer NMF cluster. Basis represented four vectors in Figure3b and consensus represented four clusters. (B). Coefficient map of pan-cancer NMF cluster. (C). Pan-cancer evolution process across stages according to NMF cluster result. (D). Schematic diagram of four cancer evolution patterns from normal to tumor. Tree: High order evolution process with dominant driver genes. Chaos: No dominant driver genes and multiple kinds of evolutionary paths. Biconvex: Joint of early-chaos and late-tree, and had dominant driver genes in late stage. Cambrian: Peaceful early stage combined with explosion of gene mutation and evolutionary paths in late stage.

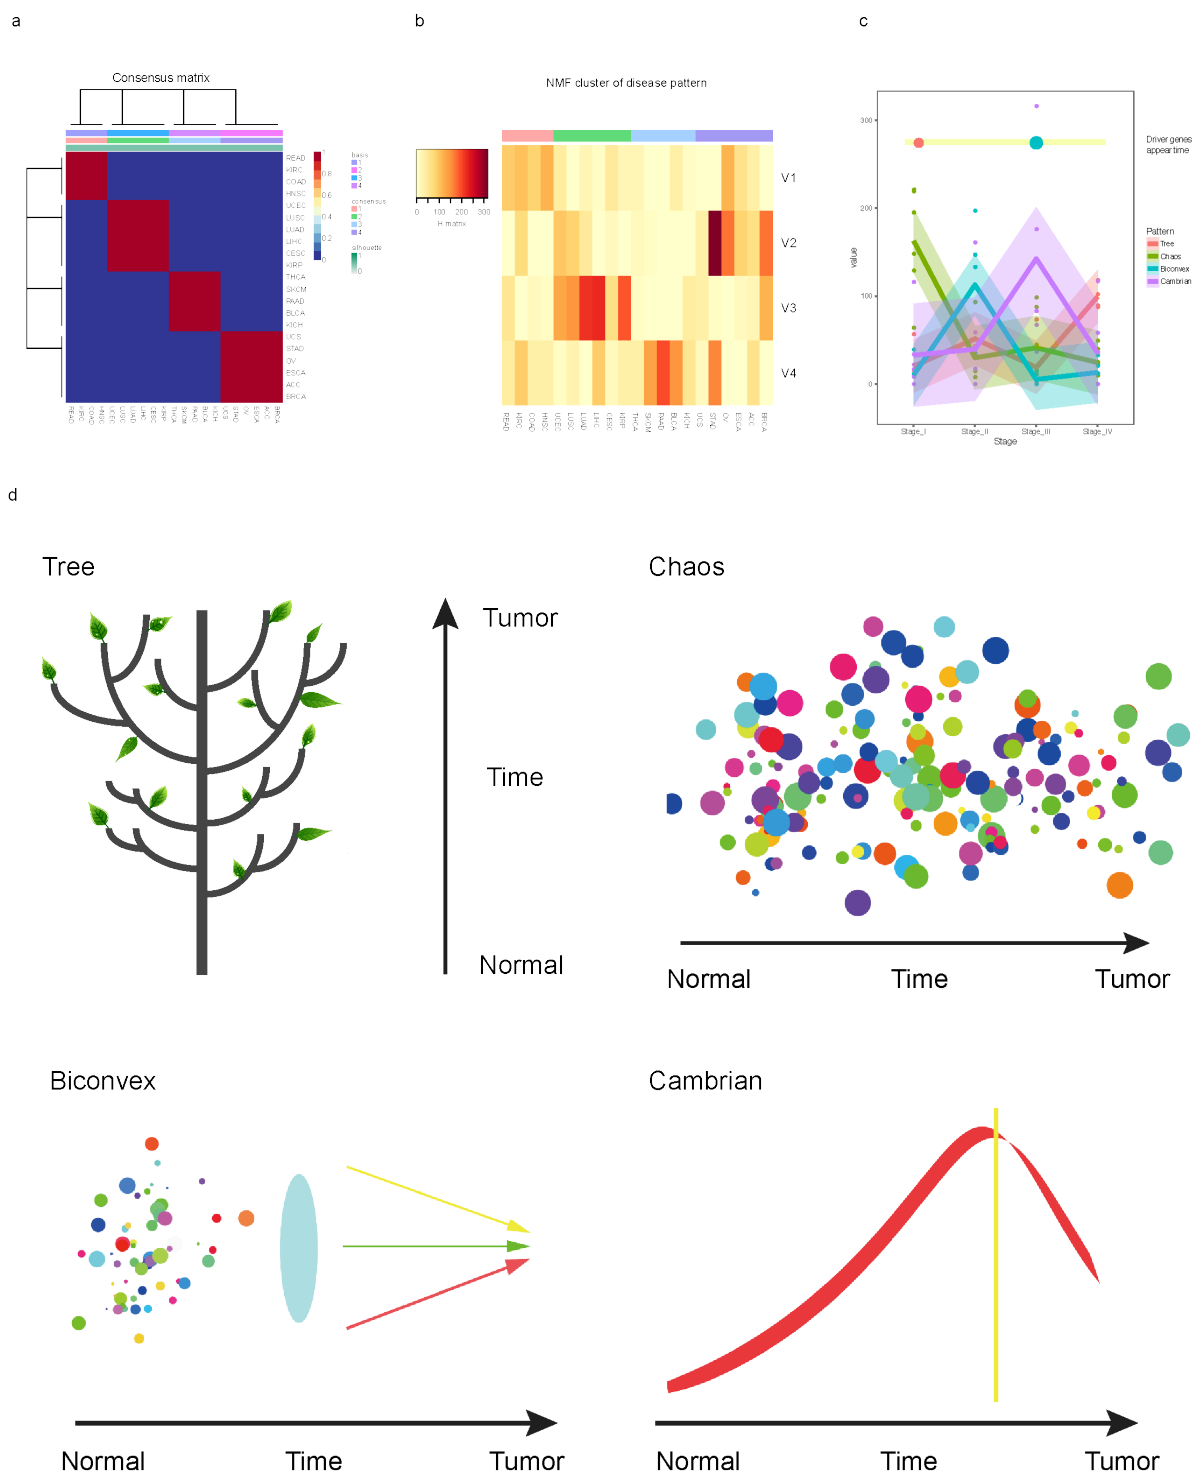

140

141

142

The first cluster had no significantly dominated vector, and only vector 1 showed a slight

143

advantage. KIRC and READ had three vectors with remarkable mixture coefficient (H matrix) while

144

HNSC and COAD had two. Tumors in this pattern showed major evolutionary paths in DAGs, and

145

progressed smoothly. Driver genes with high-frequency mutations (e.g., VHL gene in KIRC and APC

146 gene in COAD) appeared in early pathological stages, and were close to normal node in DAGs of all  
147 pathological stages. This process is similar to the growth of trees, so-named “tree” pattern. From the  
148 perspective of competitive evolution of tumor cloning, the “tree” model indicates that certain tumor  
149 clones dominate tumorigenesis and development, and tumor clones presents a competitive equilibrium  
150 with each other, and tumor heterogeneity is low in this case. The second cluster was dominated by  
151 vector 3, while mixture coefficient of other vectors in this cluster were in average. No driver genes  
152 were found in DAGs of this cluster. Instead of major evolutionary paths, tumors in this cluster like  
153 CESC exhibited multiple kinds of evolutionary paths, resulting in highly heterogeneity. Thus, we  
154 named it as “chaos” pattern. Unlike the "tree" model, the evolutionary behavior of tumor clones  
155 corresponding to the "chaos" pattern presents a competitive evolution caused by the dissemination of  
156 a large number of non-dominant clones, and a random equilibrium state that they reach each other,  
157 and tumor heterogeneity is high in this case. The third cluster is remarkably dominated by vector 4.  
158 Different from the other clusters, vector 3 in this cluster showed a comparatively low mixture  
159 coefficient. Limited evolutionary paths were observed in stage I, but more appeared in stage II.  
160 Although multiple evolutionary paths appeared in this stage, no one exhibited dominance. In late-  
161 stage (III and IV), the mutation frequency of driver genes (e.g., PIK3CA gene in BLCA) increased,  
162 and major evolutionary paths were formed. The late-stage performance of this pattern is more smooth  
163 due to the appearance of major evolutionary paths. Just like a biconvex to make dispersed light  
164 converged, we named this cluster as a “biconvex” pattern. The "biconvex" pattern reflects the  
165 different evolutionary patterns of tumor cloning. At the beginning, there are only a small number of  
166 tumor clones, and the competitive evolution is in an equilibrium state with no dominant clones. Then,  
167 the tumor clone containing the driving gene appears, and through competitive evolution suppresses  
168 the survival of other tumor clones and evolves into a dominant tumor clone, and tumor heterogeneity  
169 at the final stage is low in this "biconvex" pattern. The fourth cluster is dominated by vector 2 while  
170 vector 1 also showed a remarkable mixture coefficient. Tumors in this cluster had moderate number  
171 of evolutionary paths and few genes with high-frequency mutations in early-stage. Enormous  
172 evolutionary paths spring up since stage III in cancers like BRCA, looking like the Cambrian. So, we  
173 called it “Cambrian” pattern. Tumors in this cluster usually had no SNV driver genes, and was not



174 SNV dominated (**Table S1**). The "Cambrian" pattern seems to be exactly the opposite of "biconvex".  
175 At the beginning, only a moderate number of tumor clones occurred, and then in the middle and late  
176 stages of tumorigenesis and development, the number of tumor clones suddenly exploded. At this  
177 time, the unique pattern of tumor cloning evolution of "chaos" pattern appeared, and a large number  
178 of non-dominant tumor clones reached the final competitive evolutionary balance. At the final stage,  
179 the tumor exhibits a high degree of heterogeneity.

180

### 181 **Survival outcomes of pan-cancer evolution patterns**

182 After identifying the cancer evolution patterns, we explored survival outcomes for each  
183 evolution pattern. Among all the evolution patterns (**Fig. 3a and Table S3**), Cambrian pattern  
184 showed a significant distinction in survival outcome between early and late stages. Because increased  
185 evolutionary paths in late stages hastened tumor progression, leading to high tumor heterogeneity and  
186 causing bad survival outcome. In biconvex pattern, a better survival outcome was found in stage III  
187 rather than stage II (Wald test, p-value=0.038, HR: 3.189(2.691~3.793)). Because scattered  
188 evolutionary paths in stage II became disciplinary to form major evolutionary paths in stage III,  
189 resulting in decrement of tumor heterogeneity. Chaos and tree patterns had similar survival pattern  
190 across different pathological stages. Their survival curves were regular, and the differences between  
191 adjacent pathological stages were uniform. As more evolutionary paths lead to high heterogeneity and  
192 result in aggressive clinical outcome, tree pattern showed a better survival outcome than chaos pattern.  
193 The stage by stage progression is accordant with tree pattern but unexpected for chaos pattern. One  
194 possible explanation is that the multiple kinds of evolutionary paths observed in stage I in chaos  
195 pattern expanded to tree pattern subclones. The diversity of chaos pattern evolutionary paths and lack  
196 of major evolutionary path contributed to its high heterogeneity.

197 **Figure 3:** Survival analysis of pan-cancer evolution pattern. (A). Survival outcome of each  
198 pathological stages in different evolution pattern. (B). Survival outcome of each cancer evolution  
199 pattern in different pathological stages.

200

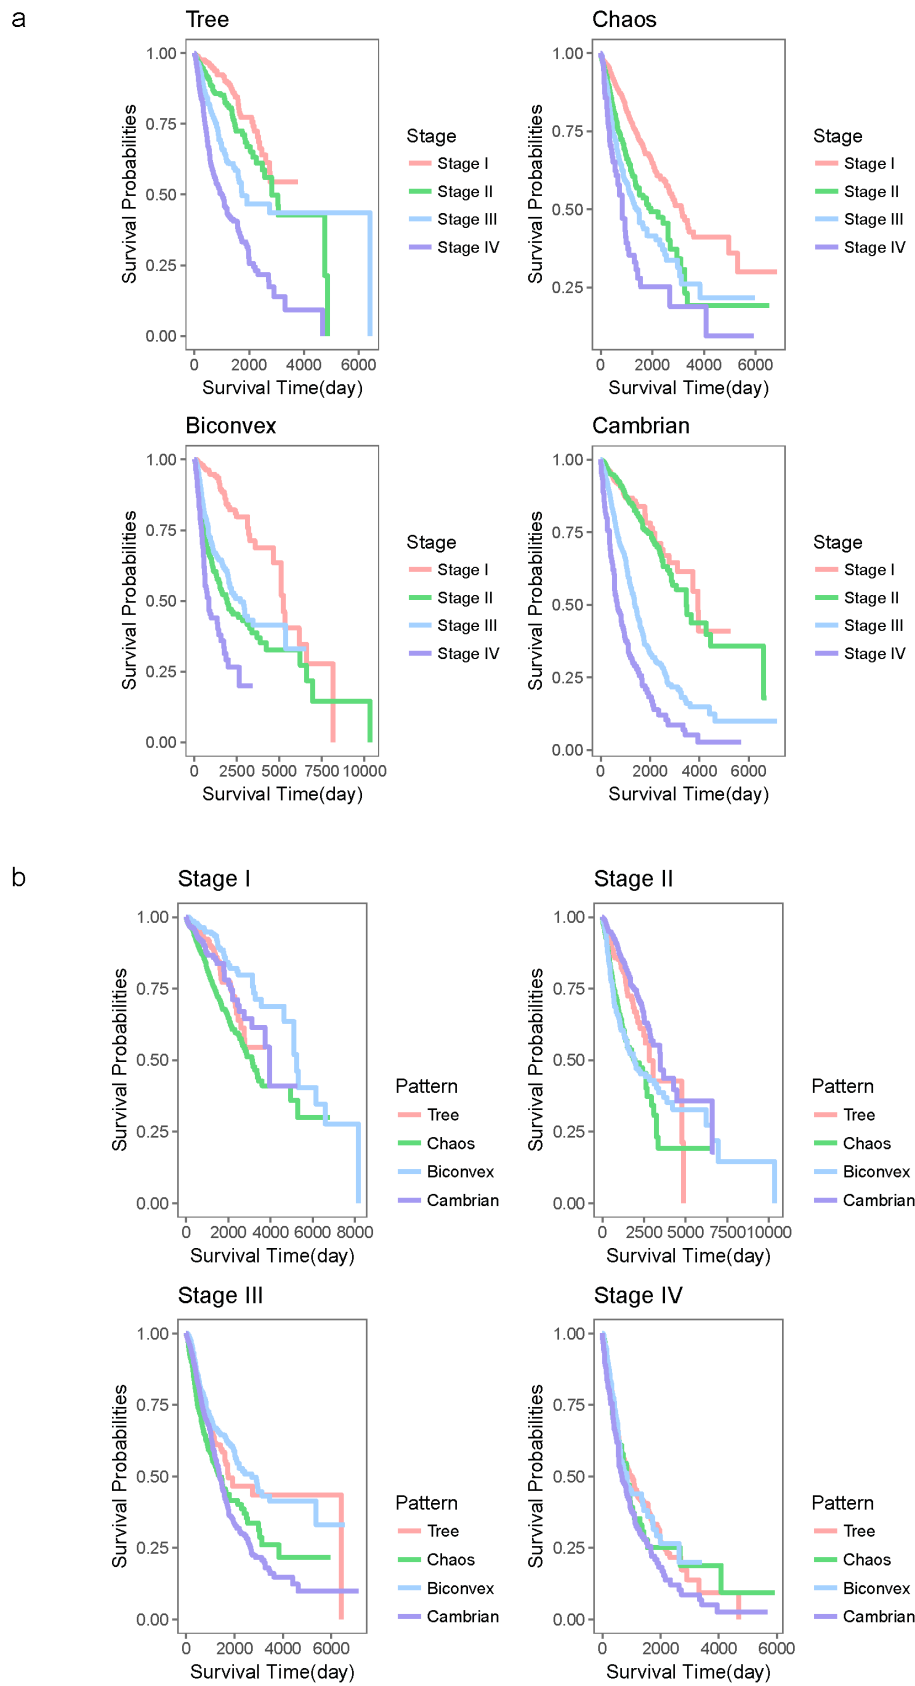

201

202

203 Additionally, we also compared the survival outcomes among all the evolution patterns in  
204 each pathological stage (**Fig. 3b** and **Table S3**). Cambrian pattern showed a comparatively good  
205 survival outcome in early stages. However, its survival outcome turned to be the worst among all the  
206 evolution patterns in the last stages. Due to its orderliness, tree pattern exhibited moderate survival  
207 outcomes in all pathological stages compared to other evolution patterns. Biconvex pattern had a  
208 comparatively lousy survival outcome in stage II due to the similar environment with chaos pattern.  
209 After major evolutionary paths formed, the survival curve of biconvex pattern showed high similarity  
210 with tree pattern in stage IV (Wald test, p-value=0.97, HR: 0.996(0.777~1.276)). As expected, chaos  
211 pattern employed the worst survival outcomes in almost all pathological stages due to the high tumor  
212 heterogeneity.

213

#### 214 **Biological function analysis for pan-cancer evolution patterns**

215 We also performed functional analysis for the evolution patterns based on the differentially  
216 expressed genes in cancers. We used a threshold of p-value<0.01 and fold-change >3 to detect  
217 differentially expressed genes (DEGs) in genomic data of cancers. For each evolution pattern, we  
218 merged all tumors and DEGs into a single network based on their belonging relationship (**Fig. 4a**).  
219 We also added links between genes according to Human Protein Reference Database (HPRD) protein-  
220 protein interactions (PPI). Chaos pattern has the highest network heterogeneity and tree pattern has  
221 the most centralized network structure (**Table S4, Fig. S3**). Statistical information for cancer  
222 connection degree and PPI degree of each DEGs was represented in **Table S5**. Some DEGs were  
223 highly connected to cancers, but their PPI degrees were comparatively low (e.g., FOXM1 and PDK4).  
224 They were likely to be a consequence rather than an inducement. However, DEGs with high degrees  
225 in both PPI and cancer-connection should be valued. Among these high degree genes, MMP9, MMP2,  
226 DES, DCN, COL1A1, SPP1 and CAV1 enriched together in multi-pathways. They functioned  
227 together in four cancer evolution pattern.

228 **Figure 4:** Function analysis of pan-cancer evolution patterns. (A). PPI network of high degree(>5)  
229 DEG nodes. (B). KEGG pathway enrichment of high degree nodes (>5) in each cancer evolution  
230 pattern PPI network. Enrichment FDR p-value (left), regulation area (middle), paths (right).

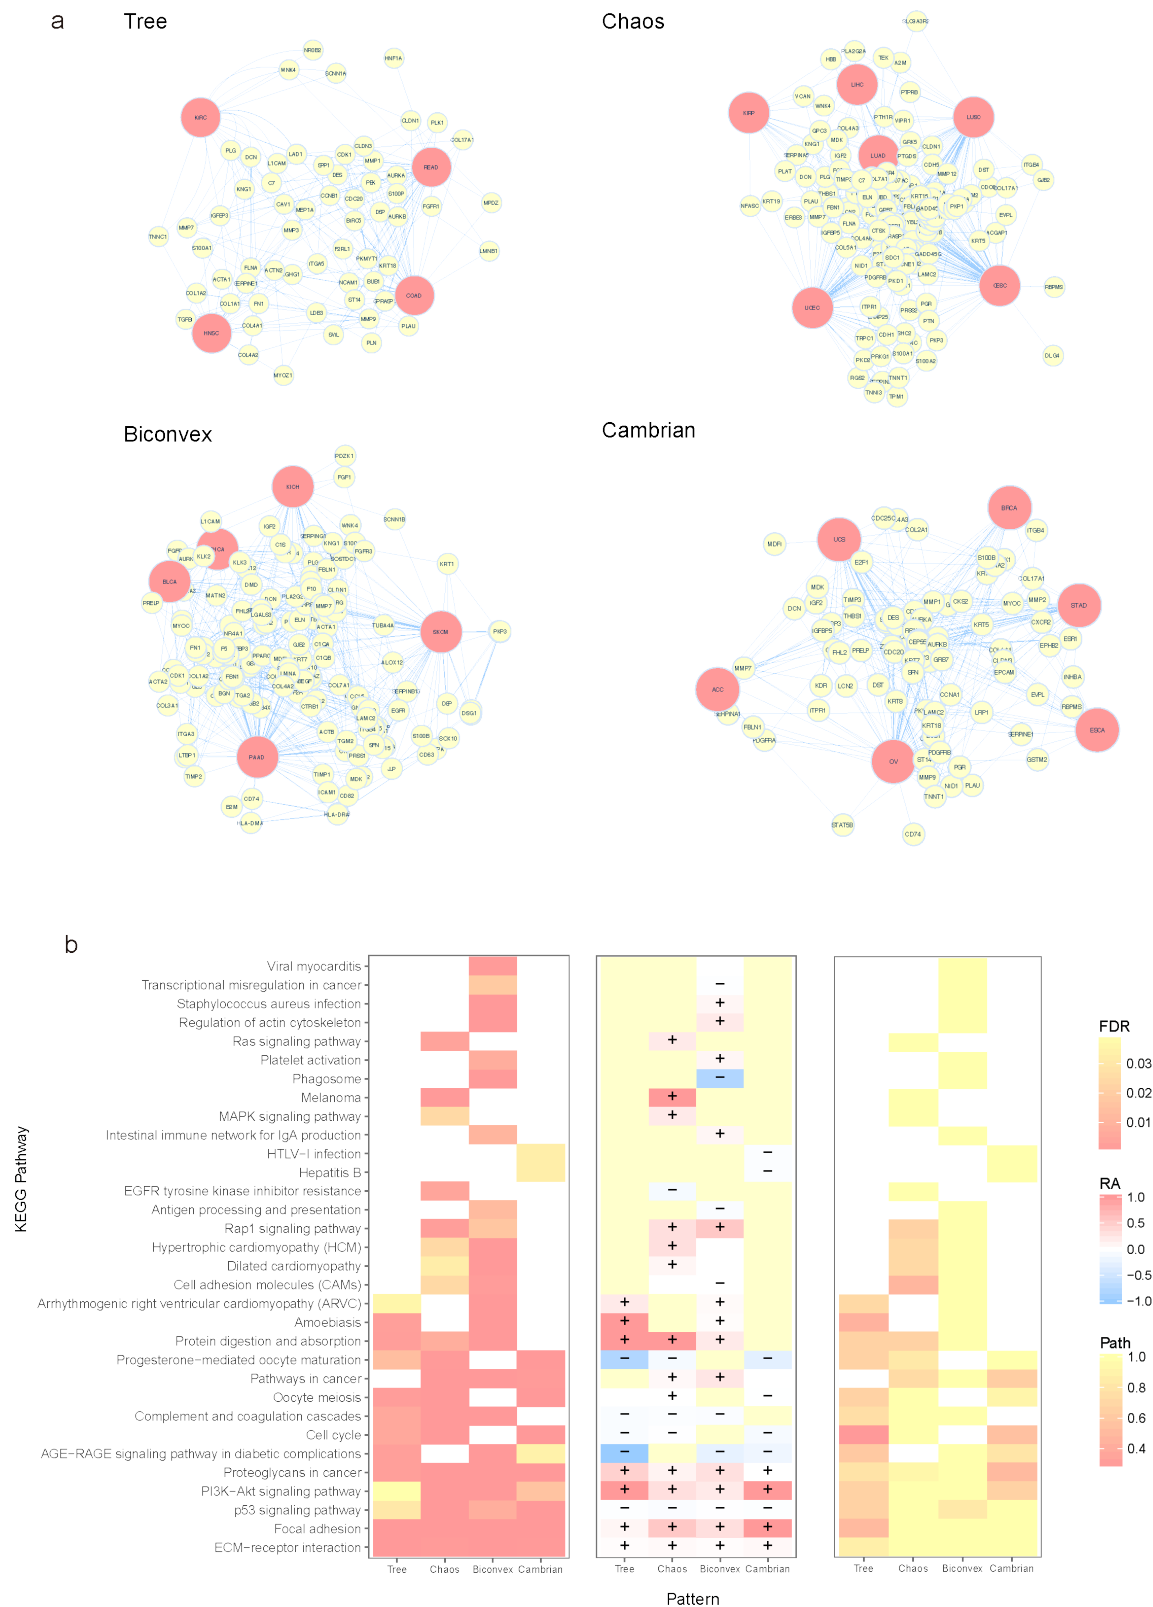

231

232

233

Based on the PPI network for differentially expressed genes for each evolution pattern, we

234

picked out high degree DEGs ( $\geq 5$ ) for further functional enrichment analysis. Diverse cancer

235 evolution progression needs identical variations of pathways and genes, which always influence the  
236 basic functions of cancers. Functional analysis indicated that the evolution patterns shared five  
237 biological pathways, i.e., ECM-receptor interaction, focal adhesion, p53 signaling pathway, PI3K-Akt  
238 signaling pathway and proteoglycans in cancer (**Fig. 4b**). Although most pattern-shared pathways  
239 were confirmed cancer hallmarks, four evolution patterns had their particular pathways, for example,  
240 Hepatitis B pathway in Cambrian pattern and MAPK signaling pathway in chaos pattern. Besides,  
241 there were seven pathways shared by three evolution patterns, e.g., AGE-RAGE signaling pathway  
242 and protein digestion and absorption. They were not often discussed in cancer studies before. But they  
243 were closed to inflammation which is a preprocess of cancer(Riehl et al. 2009). AGE-RAGE  
244 signaling pathway was absent only in chaos pattern, and functions to increase oxidative stress  
245 generation and evoke inflammatory, fibrotic, proliferative, etc. Tree pattern had the least unique  
246 pathways, while the unique pathways for chaos and biconvex patterns were more variable, due to their  
247 heterogeneity in the early pathological stages. Cambrian pattern didn't show a lot of exclusive  
248 pathways due to its diversity in late pathological stages.

249 We also evaluated these enriched pathways by DEG locations and directed paths in the same  
250 KEGG pathways. Five common pathways showed high similarity in DEG locations. Tree pattern had  
251 the least directed paths and highest centralization regulation area, indicating throughout major  
252 evolution paths. Despite various evolution paths appeared in Cambrian pattern in the late stages, their  
253 functional variation focused on minimum pathways. Most of the pathways were in downstream  
254 regulations and directed paths inside pathway were also limited. The explosion seemed to be an effect  
255 of system disorders accumulation. Chaos and biconvex patterns showed high similarity in **Fig. 4b**,  
256 and had more enriched pathways than the others. Biconvex pattern is consisting of early-chaos and  
257 late-tree, which coincident with its survival outcome. Compared to chaos pattern, it had more directed  
258 paths and downstream genes. The downstream early-chaos relieved system deterioration and resulted  
259 in better survival outcome.

260

261 **Discussion**

262 Many investigations have used genome information (e.g., SNV, CNV, and DNA methylation)  
 263 and proteomic data to perform pan-cancer studies. However, cancer is a time-dependent evolution  
 264 process and survival outcome is also a time-corresponding symptom. The reconstruction of  
 265 evolutionary paths is able to provide a novel insight to understand tumor progression. In the current  
 266 study, the hypothesis is that evolutionary paths impact on tumor heterogeneity. Multiple evolutionary  
 267 paths would lead to high tumor heterogeneity. Additionally, dominated timing of the major  
 268 evolutionary path also made effect on cancer progression. To verify this point, we reconstructed pan-  
 269 cancer evolution process by BML using mutation data, and identified four pan-cancer evolution  
 270 patterns based on NMF clustering for 21 type of cancers: tree pattern with moderate progression,  
 271 chaos pattern with high disorder, biconvex pattern with significant distinctions between early and late  
 272 stages, and Cambrian pattern with an explosion in late stages. The classification based on the  
 273 evolution patterns is in good accord with both clinical performance and biological evidences (e.g.,  
 274 gene expression and protein-protein interactions). We generated features of four evolution patterns in  
 275 **Table 1.**

276 **Table 1: Differences of four evolution patterns.** Evolution features of diseases in four evolution  
 277 patterns according to our research.

| Pattern  | Disease                            | Evolution path                                                   | Driver dominant stage | Survival rate across stages                                         | Survival outcome among patterns          | Unique high degree DEGs (TOP 5)      | Regulation area               | Paths inside enriched pathway                               | Heterogeneity                            | Clinical aggressivity                               |
|----------|------------------------------------|------------------------------------------------------------------|-----------------------|---------------------------------------------------------------------|------------------------------------------|--------------------------------------|-------------------------------|-------------------------------------------------------------|------------------------------------------|-----------------------------------------------------|
| Tree     | COAD, HNSC, KIRC, READ             | Few, gently increased with time                                  | Whole stage           | Regular survival curve, uniform differences between adjacent stages | Moderate in all stages                   | FLNA, IGFBP3, S100A1, GPRASP1, L1CAM | High centralization           | Fewest                                                      | Low                                      | Moderate in all stages                              |
| Chaos    | UCEC, LUSC, LUAD, LIHC, CESC, KIRP | Many in all stages                                               | No                    | Regular survival curve, uniform differences between adjacent stages | Worst almost in all stages               | VIM, AR, DSP, CCNB1, FGF2            | Upstream in unique pathways   | Few paths in common pathways; many paths in unique pathways | High                                     | Aggressive in all stages                            |
| Biconvex | THCA, SKCM, PAAD, BLCA, KICH       | Many in early stages. few in stage III and increased in stage IV | Late                  | Better survival outcome in stage III than stage II                  | Bad in early stages, good in late stages | EGFR, ACTB, ITGB1, MYOC, CTSG        | Downstream in unique pathways | Many                                                        | High in early stages, low in late stages | Aggressive in early stages, moderate in late stages |
| Cambrian | UCS, STAD, OV, ESCA, ACC, BRCA     | Few in early stages, rapidly increased in late stages            | No                    | Significant distinction between early and late stages               | Good in early stages, bad in late stages | LRP1, ZBTB16, EVPL, AURKB, PTN       | Downstream                    | Few                                                         | Low in early stages, high in late stages | Moderate in early stages, aggressive in late stages |

278

279

280 Tree pattern and chaos pattern are the typical evolution patterns. The former employs a major  
281 evolutionary path, leading to a comparatively low tumor heterogeneity according to our hypothesis.  
282 Cancers in this evolution pattern, e.g., COAD and READ, also have remarkable driver  
283 genes(Sottoriva et al. 2015; Pang et al. 2018; Alexander Davis, Ruli Gao 2017). Due to the low  
284 heterogeneity and smoothly progression, tree pattern showed an optimistically clinical aggressivity.  
285 Chemical and immune Therapies targeting these driver genes in tree pattern can receive a miraculous  
286 curative effect. The latter is completely out of order, and none of the evolutionary paths showed  
287 majority. The rough-and-tumble evolutionary paths and unclear evolution progression in chaos pattern  
288 lead to high tumor heterogeneity, resulting in aggressive survival outcomes. Lung cancer is a typical  
289 example for chaos pattern, which shows a remarkable tumor heterogeneity in clinical cases(Liu et al.  
290 2016). Biconvex pattern is a mixture of tree pattern and chaos pattern. Similar with chaos pattern,  
291 biconvex pattern exhibits a disordered feature in evolutionary paths in early stages. As no major  
292 evolutionary path or remarkable driver genes are detected, tumors in this evolutionary path have a  
293 comparatively high heterogeneity, resulting in a poor survival performance. However, after forming a  
294 dominant evolutionary paths in stage III, biconvex pattern shows a similar behavior to tree pattern,  
295 and have a better survival outcome compared to stage II. For the cancers in biconvex pattern, clinical  
296 treatment targeting stage III will receive a better efficacy(Krishnan et al. 2017). Cambrian pattern is a  
297 special one, because of having an explosion of evolutionary paths. Before explosion, this evolution  
298 pattern has a smooth tumor progression and shows a good survival performance, which suddenly  
299 drops off after explosion. This means that patients in this evolution pattern always suffer an  
300 emergency circumstance(Poveda et al. 2014). In conclusion, tree pattern showed a high order  
301 evolution process and resulted in optimistically clinical aggressivity. The high tumor heterogeneity in  
302 Chaos pattern and early-biconvex pattern drove poor survival performance. While late-biconvex  
303 pattern was better organized and reduced its clinical aggressivity. Cambrian pattern showed a good  
304 survival performance until the explosion happened, which sharply increased the clinical aggressivity  
305 of tumor.

306 Genes with high PPI and cancer-connection degrees, e.g., DES(Ellis et al. 2012; Seshagiri et  
307 al. 2012) and DCN(Network et al. 2011; Muzny et al. 2012), played essential roles in cancers, and

308 their expression had significant impacts on tumor environments. MMP9, MMP2, DCN, COL1A1,  
309 SPP1 and CAV1 were experimentally confirmed key genes for cancers(Huang et al. 2016; Chai et al.  
310 2016). The matrix metalloproteinase (MMP) family (MMP9 and MMP2) always functioned with  
311 growth factors, and were associated with inflammatory processes, indicating their critical roles in  
312 VEGF and other related hallmark pathways for cancers.

313         Despite various evolution paths appeared in Cambrian pattern in the late stages, their  
314 functional variation focused on minimum pathways. Most of the pathways were in downstream  
315 regulations and paths inside pathway were also limited. The explosion seemed to be an effect of  
316 system disorders accumulation. Tree pattern had the fewest paths and highest centralization regulation  
317 area, indicating throughout major evolution paths. And the biconvex pattern is consisting of early-  
318 chaos and late-tree, which coincident with its survival outcome. Compared to chaos pattern, it had  
319 more paths and downstream genes. The downstream early-chaos relieved system deterioration and  
320 resulted in better survival outcome. Additionally, in the cell adhesion molecules pathway DEGs in  
321 chaos pattern were exempted from immune system compared to biconvex pattern. The disturbance of  
322 immune system could bring out a severe evolution progression.

323         Our research reconstructed pan-cancer evolution process based on somatic mutations across  
324 four pathological stages. We proposed four cancer evolution patterns which is in consistent with their  
325 survival outcome. Except study based on genomic data, we also used gene expression data for  
326 functional enrichment analysis and explored their similarities and differences. On the other hand, we  
327 found some DEGs with high PPI degree and cancer-connection which should be valued. Our study  
328 therefore furthers the understanding of tumor progression and figured out how they drive clinical  
329 aggression.

330         The unbalance sample size and heterogeneity among different patients would be limiting  
331 factors for cancer evolution study. We used the bootstrap method to construct the evolution process  
332 and only picked out highly convincible genes (**see Methods**). The clinical aggressivity and function  
333 analysis accordant with this evolution model and advanced the understanding of tumor progression  
334 progress. On account of the different evolution patterns of different cancers, the optimum treatment  
335 time would be helpful to remit clinical aggressivity. Additionally, variations in downstream and



336 upstream of biological pathways have distinct effects. In general, drugs targeted on upstream genes  
337 always have a better therapeutic outcome, while consideration of evolution pattern would make  
338 biomarker selection more meaningful.

339

## 340 **Materials and Methods**

### 341 **Data Processing**

342 All pan-cancer samples derived from TCGA Data Portal Bulk Download (<http://tcga->  
343 [data.nci.nih.gov/tcga](http://data.nci.nih.gov/tcga))(Chang et al. 2013), with a declaration that all TCGA data are now available  
344 without restrictions on their use in publications or presentations. We used 21 kinds of cancer in total.  
345 Somatic nucleotide variants (SNV) used for the following study were subsequently annotated by  
346 Oncotator(Ramos et al. 2015) in UCSC Xena (<http://xena.ucsc.edu>), only those curated SNVs were  
347 picked out. SNV data summary and cancer descriptions are generated in **Table S1**. Cancer detection  
348 time and the biological system were obtained from (<http://www.cancer.org>). And M/C class  
349 annotation was derived from Ciriello's article(Ciriello et al. 2013). Patients have extinct pathological  
350 stage clinical information were kept while others were filtered. After removing hypermutated samples  
351 and genes with low mutation frequency ( $<3$ ), we transformed them into a 0/1 matrix (patient x  
352 mutation gene). The correlation heatmap (**Fig. 1d**) was performed by hierarchical cluster using the  
353 median and mean of gene mutation frequency and 5-year survival rate. The 5-year survival rate for  
354 each cancer was calculated using TCGA dataset, and we also evaluated cancer prognosis by existing  
355 research (<http://www.cancersurvivalrates.net>).

356

### 357 **Reconstruction of pan-cancer evolution process**

358 Cancer evolution process was reconstructed using the approach we published before(Pang et  
359 al. 2018). Combining with probability network reconstructed by Bayesian mutation landscape  
360 (BML)(Misra et al. 2014), we generated evolutionary paths including genes with both high and  
361 moderate mutation frequency. After built DAG map using raw data (**Fig. S1**), we generated  
362 convincing evolution paths using bootstrap score threshold. We randomly selected 30 samples (with

363 replacement) at each stage for 100 times in case sample bias. Nodes appeared more than 60 times, and  
364 nodes appeared more than 10 times in each pathological stage of particular cancer were kept. Genes  
365 appeared more than once in combined and separate pathological stages DAGs in the raw map were  
366 recognized as DAG key genes. These three vectors of four pathological stage were used for NMF  
367 cluster. An R script implemented this clustering process by R package “NMF”(Gaujoux and Seoighe  
368 2010). Four evolution pattern figures (**Fig. 2c**) were manually sketched. Evolutionary paths with  
369 direct connection to normal node and had more than one key genes was considered as major  
370 evolutionary path.

371

### 372 **Survival analysis of cancers in the same pattern**

373 Survival time used in this paper was the time to death or censor event. Survival curve in **Fig.**  
374 **3** was generated by Kaplan-Meier estimator and plotted by R package “survminer”. Survival analysis  
375 in **Table S3** was performed using R package “survival”(Harrington and Fleming 1982).

376

### 377 **Protein-protein interaction network of differentially expressed gene and functional enrichment** 378 **analysis**

379 Tumor gene expression data were obtained from TCGA, too. Since we only wanted to find  
380 different expression genes rather than precise quantify, gene expression data were not matched with  
381 SNV data. We used GEPIA database(Tang et al. 2017) as supplements for cancers without gene  
382 expression data in TCGA. After construct disease-gene network, we added protein-protein interaction  
383 from Human Protein Reference Database (HPRD, <http://www.hprd.org>) (Keshava Prasad et al. 2009).  
384 Network construction and analysis were generated by Cytoscape(Shannon et al. 2003). High disease-  
385 connected DEGs and high PPI degree DEGs were collected in **Table S5**. We picked out hub DEGs  
386 (degree>5) for functional enrichment using WEB-based GENE SeT Analysis Toolkit(Wang et al. 2013)  
387 for with parameters set as Bonferroni,  $p < 0.05$ .

388 After that, we separated enriched KEGG pathways to two parts, and defined genes with more  
389 downstream regulations than upstream as upper genes. Under genes referred to the opposite.

390 Regulation area was related to the amount of upper and under genes.

---

$$391 \qquad \qquad \qquad \text{Regulation area (RA)} = \frac{\text{Upper gene}}{\text{Under gene}}$$

392 We also counted paths in individual KEGG pathways, and genes with direct or indirect connection  
393 (irreversible direction) were supposed to be in the same path. RA normalization was performed global  
394 and path normalization was performed among patterns.

## 395 REFERENCES

- 396 Alexander Davis, Ruli Gao and NN. 2017. Tumor evolution: Linear, branching, neutral or punctuated? *Biochim*  
397 *Biophys Acta* **40**: 3–11.
- 398 Anderson K, Lutz C, van Delft FW, Bateman CM, Guo Y, Colman SM, Kempinski H, Moorman A V., Titley I,  
399 Swansbury J, et al. 2011. Genetic variegation of clonal architecture and propagating cells in leukaemia.  
400 *Nature* **469**: 356–61.
- 401 Chai F, Liang Y, Zhang F, Wang M, Zhong L, Jiang J. 2016. Systematically identify key genes in inflammatory  
402 and non-inflammatory breast cancer. *Gene* **575**: 600–614.
- 403 Chang K, Creighton CJ, Davis C, Donehower L, Drummond J, Wheeler D, Ally A, Balasundaram M, Birol I,  
404 Butterfield YSN, et al. 2013. The Cancer Genome Atlas Pan-Cancer analysis project. *Nat Genet* **45**: 1113–  
405 1120.
- 406 Ciriello G, Miller ML, Aksoy BA, Senbabaoglu Y, Sander C. 2013. Emerging landscape of oncogenic  
407 signatures across human cancers. *Nat Genet* **45**: 1127–1133.
- 408 Ellis MJ, Ding L, Shen D, Luo J, Suman VJ, Wallis JW, Van Tine BA, Hoog J, Goiffon RJ, Goldstein TC, et al.  
409 2012. Whole-genome analysis informs breast cancer response to aromatase inhibition. *Nature* **486**: 353–  
410 360.
- 411 Gaujoux R, Seoighe C. 2010. A flexible R package for nonnegative matrix factorization. *BMC Bioinformatics*  
412 **11**: 367.
- 413 Gong M, Jiao L, Zhang L, Du H. 2009. Immune secondary response and clonal selection inspired optimizers.  
414 *Prog Nat Sci* **19**: 237–253.
- 415 Harrington DP, Fleming TR. 1982. A Class of Rank Test Procedures for Censored Survival Data. *Biometrika* **69**:  
416 553–566.
- 417 Howell-Jones R, Bailey A, Beddows S, Sargent A, De Silva N, Wilson G, Anton J, Nichols T, Soldan K,  
418 Kitchener H. 2010. Multi-site study of HPV type-specific prevalence in women with cervical cancer,  
419 intraepithelial neoplasia and normal cytology, in England. *Br J Cancer* **103**: 209–216.

- 420 Howlader N, Noone AM, Krapcho M, Miller D, Bishop K, Kosary CL, Yu M, Ruhl J, Tatalovich Z, Mariotto A,  
421 Lewis DR, Chen HS, Feuer EJ CK. 1975. SEER Cancer Statistics Review, 1975-2014. *Cancer Stat Rev* 1–  
422 6.
- 423 Huang Q-X, Cui J-Y, Ma H, Jia X-M, Huang F-L, Jiang L-X. 2016. Screening of potential biomarkers for  
424 cholangiocarcinoma by integrated analysis of microarray data sets. *Cancer Gene Ther* **23**: 48–53.
- 425 Jögi A, Vaapil M, Johansson M, Pählman S. 2012. Cancer cell differentiation heterogeneity and aggressive  
426 behavior in solid tumors. *Ups J Med Sci* **117**: 217–224.
- 427 Keshava Prasad TS, Goel R, Kandasamy K, Keerthikumar S, Kumar S, Mathivanan S, Telikicherla D, Raju R,  
428 Shafreen B, Venugopal A, et al. 2009. Human Protein Reference Database - 2009 update. *Nucleic Acids*  
429 *Res* **37**: 767–772.
- 430 Kimura M. 1977. Preponderance of synonymous changes as evidence for the neutral theory of molecular  
431 evolution. *Nature* **267**: 192–193.
- 432 Krishnan M, Ahmed A, Walters RW, Silberstein PT. 2017. Factors Affecting Adjuvant Therapy in Stage III  
433 Pancreatic Cancer—Analysis of the National Cancer Database. *Clin Med Insights Oncol* **11**:  
434 117955491772804.
- 435 Leiserson MDM, Vandin F, Wu H-T, Dobson JR, Eldridge J V, Thomas JL, Papoutsaki A, Kim Y, Niu B,  
436 McLellan M, et al. 2015. Pan-cancer network analysis identifies combinations of rare somatic mutations  
437 across pathways and protein complexes. *Nat Genet* **47**: 106–114.
- 438 Liu Y, Zhang J, Li L, Yin G, Zhang J, Zheng S, Cheung H, Wu N, Lu N, Mao X, et al. 2016. Genomic  
439 heterogeneity of multiple synchronous lung cancer. *Nat Commun* **7**: 1–8.
- 440 Misra N, Szczurek E, Vingron M. 2014. Inferring the paths of somatic evolution in cancer. *Bioinformatics* **30**:  
441 2456–2463.
- 442 Muzny DM, Bainbridge MN, Chang K, Dinh HH, Drummond J a., Fowler G, Kovar CL, Lewis LR, Morgan  
443 MB, Newsham IF, et al. 2012. Comprehensive molecular characterization of human colon and rectal  
444 cancer. *Nature* **487**: 330–337.
- 445 Network T, institution.) (Participants are arranged by area of contribution and then by, Sites D, Bell D,  
446 Berchuck A, Birrer M, Chien J, Cramer DW, Dao F, Dhir R, et al. 2011. Integrated genomic analyses of  
447 ovarian carcinoma. *Nature* **474**: 609–615.
- 448 Nowak MA, Michor F, Iwasa Y. 2003. The linear process of somatic evolution. *Proc Natl Acad Sci U S A* **100**:  
449 14966–9.

- 450 Nowell PCC, Nowell PC. 1976. The clonal evolution of tumor cell populations. *Science (80- )* **194**: 23–28.
- 451 Pang S, Sun Y, Wu L, Yang L, Zhao YL, Wang Z, Li Y. 2018. Reconstruction of kidney renal clear cell  
452 carcinoma evolution across pathological stages. *Sci Rep* **8**: 1–8.
- 453 Perry Evans, Stefan Avey, Yong Kong MK. 2013. Adjusting for background mutation frequency biases  
454 improves the identification of cancer driver genes. *IEEE Trans Nanobioscience* **31**: 1713–1723.
- 455 Plummer M, de Martel C, Vignat J, Ferlay J, Bray F, Franceschi S. 2016. Global burden of cancers attributable  
456 to infections in 2012: a synthetic analysis. *Lancet Glob Heal* **4**: e609–e616.
- 457 Poveda A, Ray-Coquard I, Romero I, Lopez-Guerrero JA, Colombo N. 2014. Emerging treatment strategies in  
458 recurrent platinum-sensitive ovarian cancer: Focus on trabectedin. *Cancer Treat Rev* **40**: 366–375.
- 459 Ramos AH, Lichtenstein L, Gupta M, Lawrence MS, Pugh TJ, Saksena G, Meyerson M, Getz G. 2015.  
460 Oncotator: Cancer variant annotation tool. *Hum Mutat* **36**: E2423–E2429.
- 461 Riehl A, Németh J, Angel P, Hess J. 2009. The receptor RAGE: Bridging inflammation and cancer. *Cell*  
462 *Commun Signal* **7**: 1–7.
- 463 Seshagiri S, Stawiski EW, Durinck S, Modrusan Z, Storm EE, Conboy CB, Chaudhuri S, Guan Y, Janakiraman  
464 V, Jaiswal BS, et al. 2012. Recurrent R-spondin fusions in colon cancer. *Nature* **488**: 660–664.
- 465 Shannon P, Markiel A, Owen Ozier 2, Baliga NS, Wang JT, Ramage D, Amin N, Schwikowski B, Ideker T.  
466 2003. Cytoscape: a software environment for integrated models of biomolecular interaction networks.  
467 *Genome Res* 2498–2504.
- 468 Sottoriva A, Kang H, Ma Z, Graham TA, Salomon MP, Zhao J, Marjoram P, Siegmund K, Press MF, Shibata D,  
469 et al. 2015. A Big Bang model of human colorectal tumor growth. *Nat Genet* **47**: 209–216.
- 470 Tang Z, Li C, Kang B, Gao G, Li C, Zhang Z. 2017. GEPIA: A web server for cancer and normal gene  
471 expression profiling and interactive analyses. *Nucleic Acids Res* **45**: W98–W102.
- 472 Wang H, Naghavi M, Allen C, Barber RM, Carter A, Casey DC, Charlson FJ, Chen AZ, Coates MM,  
473 Coggeshall M, et al. 2016. Global, regional, and national life expectancy, all-cause mortality, and cause-  
474 specific mortality for 249 causes of death, 1980–2015: a systematic analysis for the Global Burden of  
475 Disease Study 2015. *Lancet* **388**: 1459–1544.
- 476 Wang J, Duncan D, Shi Z, Zhang B. 2013. WEB-based GEne SeT AnaLysis Toolkit ( WebGestalt ): update  
477 2013. *Nucleic Acids Res* **41**: 77–83.
- 478 Williams MJ, Werner B, Barnes CP, Graham TA, Sottoriva A. 2016. Identification of neutral tumor evolution  
479 across cancer types. *Nat Genet* **48**: 238–244.

480 Yang X, Gao L, Zhang S. 2017. Comparative pan-cancer DNA methylation analysis reveals cancer common  
481 and specific patterns. *Brief Bioinform* **18**: 761–773.

482 Zack TI, Schumacher SE, Carter SL, Cherniack AD, Saksena G, Tabak B, Lawrence MS, Zhang C-Z, Wala J,  
483 Mermel CH, et al. 2013. Pan-cancer patterns of somatic copy number alteration. *Nat Genet* **45**: 1134–1140.

484 Zhang F, Ju Z, Liu W, Yang JY, Li J, Ling S, Seviour EG, Ram PT, Minna JD, Diao L, et al. 2014. A pan-  
485 cancer proteomic perspective on The Cancer Genome Atlas. *Nat Commun* **5**: 3887.

486

## 487 **Acknowledgements**

488 This work was supported by the National Key R&D Program of China (2016YFC0901704,  
489 2017YFA0505500, 2016YFC0902400) and the Youth Innovation Promotion Association CAS  
490 (2017325).

491

## 492 **Author contributions**

493 S.C.P designed the evolution reconstruction process and carried out the analysis. X.S helped with  
494 the algorithm. S.C.P, Y.D.S and L.L.W prepared Figures. S.C.P and J.F.W. wrote the main manuscript  
495 text. Z.W, Y.L.Z and Y.X.L conceived and supervised the experiments. All authors reviewed the  
496 manuscript.

497

## 498 **Additional Information**

499 **Competing interests:** The authors declare no competing financial interests.

500

## 501 **Corresponding author**

502 **Correspondence to:** YiXue Li, Zhen Wang, Yi-Lei Zhao and Jingfang Wang

503

504

505
